# Supplementary material for: Membrane fluidity properties of lipid-coated polylactic acid nanoparticles
Source: Royal Society of Chemistry journal article supplement (doi:10.1039/d3nr06464f), 2024-01-01
Supplement: d3nr06464f1.pdf [file d3nr06464f1.pdf]

Supporting Information to

## Membrane fluidity properties of lipid-coated polylactic acid nanoparticles

Yuanqing Gu<sup>a</sup> and Björn M. Reinhard\*<sup>b</sup>

<sup>a</sup>Department of Chemistry and The Photonics Center, Boston University, Boston, MA 02215, USA. Email: yqgu@bu.edu

<sup>b</sup>Department of Chemistry and The Photonics Center, Boston University, Boston, MA 02215, USA. Email: bmr@bu.edu

### Table of Contents

|                                                                                                                                                      |   |
|------------------------------------------------------------------------------------------------------------------------------------------------------|---|
| S1. Quantification of relative cholesterol concentration in $\text{LNP}_x^{\text{CHOL}}$ by cholesterol assay kit .....                              | 2 |
| S2. Colocalization of LNPs and fluorescently labelled lipid membrane around the polymer core by darkfield and fluorescence imaging .....             | 3 |
| S3. DSC thermograms of $\text{LNP}_{20}^{\text{CHOL}}$ .....                                                                                         | 4 |
| S4. Comparison of C-Laurdan GP(T) measurements of LNPs and PLA NPs.....                                                                              | 5 |
| S5. C-Laurdan GP(T) measurements of $\text{Liposome}_x^{\text{CHOL}}$ and $\text{LNP}_x^{\text{CHOL}}$ with and without background subtraction ..... | 6 |
| S6. The representative tangent constructions for $T_{\text{on}}$ and $T_{\text{off}}$ determination .....                                            | 7 |

## S1. Quantification of relative cholesterol concentration in $\text{LNP}_x^{\text{CHOL}}$ by cholesterol assay kit

**Cholesterol assay.** Relative cholesterol loading on  $\text{LNP}_x^{\text{CHOL}}$  were quantified through Amplex™ Red Cholesterol Assay Kit (NO. A12216, ThermoFisher). A cholesterol standard curve was prepared through diluting the appropriate amount of  $2 \text{ mg mL}^{-1}$  ( $5.17 \text{ mM}$ ) cholesterol reference standard into 1X Reaction Buffer to produce cholesterol concentrations of 0 to  $8 \text{ } \mu\text{g mL}^{-1}$  (0 to  $\sim 20 \text{ } \mu\text{M}$ ). 1X Reaction Buffer without cholesterol was used as a negative control. The cholesterol-containing samples were diluted in 1X Reaction Buffer. A volume of  $50 \text{ } \mu\text{L}$  of the diluted samples, standards, and controls were pipetted into separate wells of a 96-well microplate. Then  $50 \text{ } \mu\text{L}$  of the Amplex® Red reagent/HRP/cholesterol oxidase/cholesterol esterase working solution was added to each microplate well containing the samples, standards, and controls. The reactions were incubated for 1 hour at  $37 \text{ } ^\circ\text{C}$  protected from light. The fluorescence was measured in a fluorescence microplate reader (SpectraMax M5) using excitation at  $560 \text{ nm}$  and emission detection at  $590 \text{ nm}$ . The background fluorescence was corrected by subtracting the values derived from the no-cholesterol control.

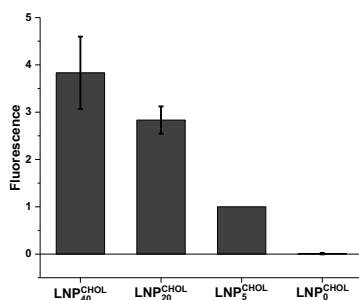

**Fig. S1.** Relative cholesterol concentration in  $\text{LNP}_x^{\text{CHOL}}$  quantified by cholesterol assay kit ( $n=3$ ).  $\text{LNP}_0^{\text{CHOL}}$  means LNPs without cholesterol as blank controls.  $\text{LNP}_5^{\text{CHOL}}$  was used as a reference and other  $\text{LNP}_x^{\text{CHOL}}$  were normalized based on  $\text{LNP}_5^{\text{CHOL}}$  for ratiometric fluorescence in cholesterol assay. Error bars represent standard deviation.

## S2. Colocalization of LNPs and fluorescently labelled lipid membrane around the polymer core by darkfield and fluorescence imaging

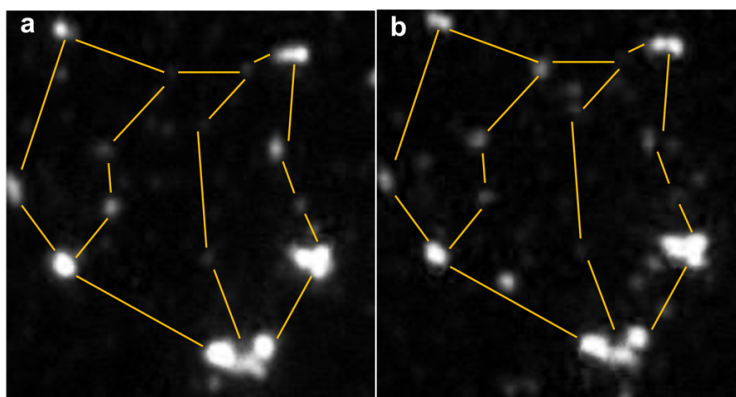

$$\begin{aligned} \text{Colocalization (\%)} &= \frac{\text{Number of NPs in darkfield image overlapping with fluorescence image}}{\text{Total number of NPs in darkfield image}} \\ &= \frac{14}{20} = 70\% \end{aligned}$$

**Fig. S2.** Colocalization of LNPs and fluorescently labelled lipid membrane around the polymer core by darkfield and fluorescence imaging. One example of dark field image (a) and fluorescence image (b) of LNP<sub>40</sub><sup>DOPC</sup>. 2 mol% of fluorescent lipid (16:0 Liss Rhod PE) was incorporated to lipid membrane for labelling. Yellow lines were used for colocalization between dark field and fluorescence images. Colocalization percentage was calculated by dividing the number of NPs in darkfield image overlapping with fluorescence image by the total number of NPs in darkfield image. Four image sets were used for the average colocalization percentage calculation. The colocalization percentage of the given example is 70%, while the average colocalization percentage is 73%.

### S3. DSC thermograms of LNP<sub>20</sub><sup>CHOL</sup>.

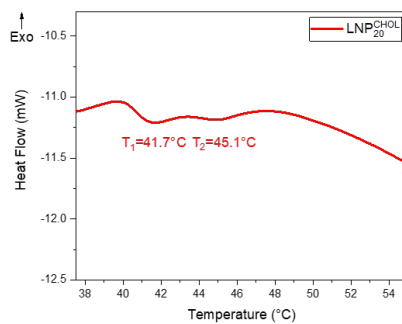

**Fig. S3.** DSC thermograms of LNP<sub>20</sub><sup>CHOL</sup>. Two separate features, T<sub>1</sub> and T<sub>2</sub>, indicate glass and phase transition of polymer core and lipid membrane.

## S4. Comparison of C-Laurdan GP(T) measurements of LNPs and PLA NPs

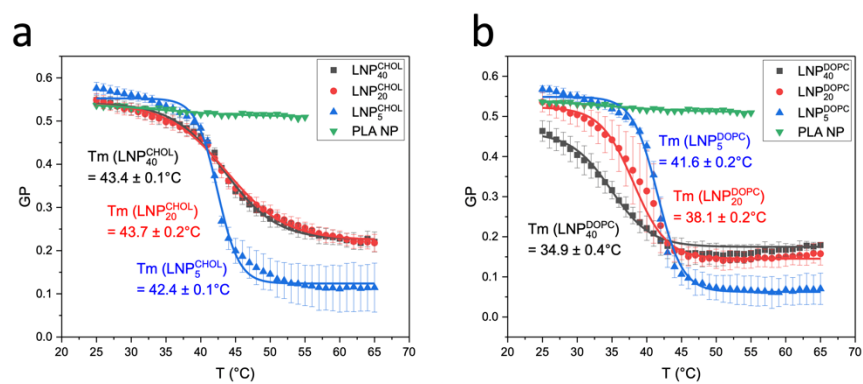

**Fig. S4.** Comparison of C-Laurdan GP(T) measurements of LNPs and PLA NPs. (a) GP(T) curves for LNP<sub>x</sub><sup>CHOL</sup> and PLA NP. (b) GP(T) curves for LNP<sub>x</sub><sup>DOPC</sup> and PLA NP. Error bars in (a, b) represent standard deviation.

S5. C-Laurdan GP(T) measurements of Liposome<sub>x</sub><sup>CHOL</sup> and LNP<sub>x</sub><sup>CHOL</sup> with and without background subtraction

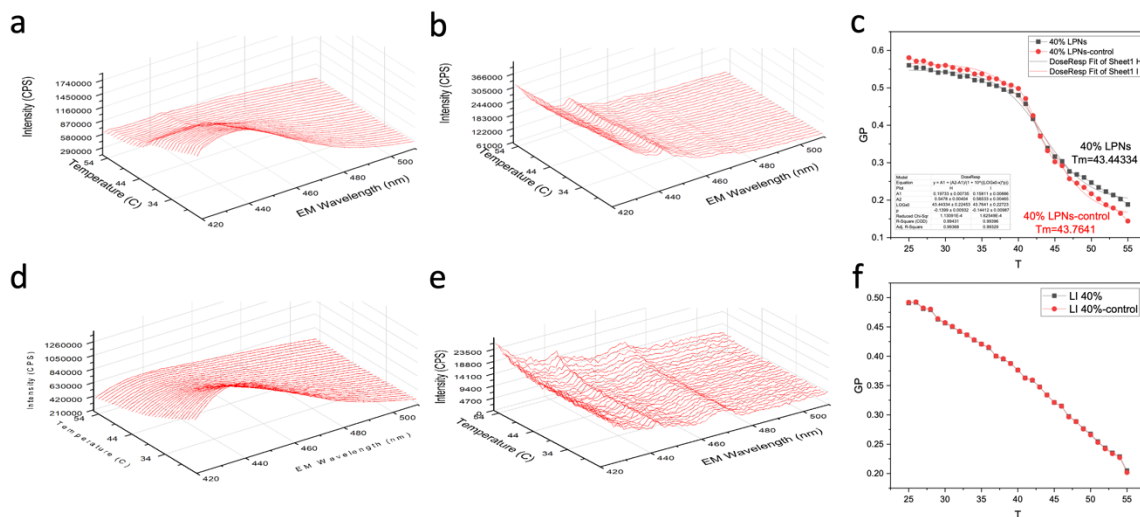

**Fig. S5.** C-Laurdan spectra and GP measurements of LNP<sub>40</sub><sup>CHOL</sup> and Liposome<sub>40</sub><sup>CHOL</sup> with and without C-Laurdan. 3-dimensional (3-D) spectra of LNP<sub>40</sub><sup>CHOL</sup> with (a) and without (b) C-Laurdan. (c) C-Laurdan GP(T) plots for LNP<sub>40</sub><sup>CHOL</sup>. The black-square curve was obtained directly from GP values calculated from spectra (a). The red-circle curve was obtained by subtracting the GP values of spectra (b) from the GP values of spectra (a) (background correction). 3-D spectra of Liposome<sub>40</sub><sup>CHOL</sup> with (d) and without (e) C-Laurdan. (f) C-Laurdan GP(T) plots for Liposome<sub>40</sub><sup>CHOL</sup>. The black-square curve was obtained directly from GP values calculated from spectra (d). The red-circle curve was obtained by subtracting the GP values of spectra (e) from the GP values of spectra (d) (background correction).

S6. The representative tangent constructions for  $T_{on}$  and  $T_{off}$  determination

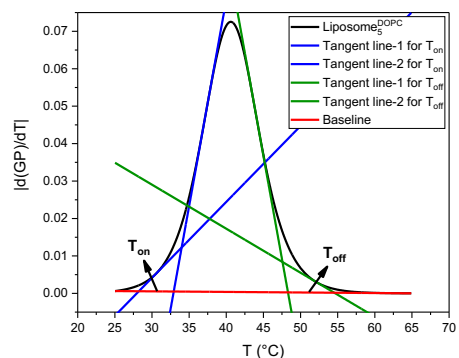

**Fig. S6.** The representative tangent constructions for  $T_{on}$  and  $T_{off}$  determination. For example, in the case of Liposome  $5^{DOPC}$ , the two blue lines are tangent to the left side of the bell-shaped curve at the points of steepest slope and of greatest curvature. The mean of the intersection points of the two blue lines with the baseline (red line) was taken as  $T_{on}$ . Similarly, two green lines are tangent to the right side of the bell-shaped curve at the points of steepest slope and of greatest curvature. The mean of the intersection points of the two green lines with the baseline (red line) was taken as  $T_{off}$ .
